# Supplementary material for: Thetha Nami: participatory development of a peer-navigator intervention to deliver biosocial HIV prevention for adolescents and youth in rural South Africa
Source: PubMed Central journal article supplement (PMC8278686; doi:10.1186/s12889-021-11399-z), 2021-07-13
Supplement: 12889_2021_11399_MOESM1_ESM.pdf [file 12889_2021_11399_MOESM1_ESM.pdf]

| <b>PEER NAVIGATORS TRAINING PROGRAMME AND LEARNING OBJECTIVES</b>                                                                                                                                                                                                                                                                                                                                                                                                                                                                                                                                                                                                                                                                                                                                                                           |                 |                    |
|---------------------------------------------------------------------------------------------------------------------------------------------------------------------------------------------------------------------------------------------------------------------------------------------------------------------------------------------------------------------------------------------------------------------------------------------------------------------------------------------------------------------------------------------------------------------------------------------------------------------------------------------------------------------------------------------------------------------------------------------------------------------------------------------------------------------------------------------|-----------------|--------------------|
| <b>TITLE</b>                                                                                                                                                                                                                                                                                                                                                                                                                                                                                                                                                                                                                                                                                                                                                                                                                                | <b>DURATION</b> | <b>FACILITATOR</b> |
| <b>INTRODUCTION-</b> getting to know each other                                                                                                                                                                                                                                                                                                                                                                                                                                                                                                                                                                                                                                                                                                                                                                                             | 45min           | Nonhlanhla         |
| <b>BASIC HEALTH AND SAFETY LEARNING OBJECTIVES</b>                                                                                                                                                                                                                                                                                                                                                                                                                                                                                                                                                                                                                                                                                                                                                                                          |                 | Marlise            |
| To know the expected behaviour while at AHRI premises<br>Assembly points during of emergency                                                                                                                                                                                                                                                                                                                                                                                                                                                                                                                                                                                                                                                                                                                                                | 1hour           | Marlise/Nonhlanhla |
| <b>AHRI SOMKHELE SITE BUILDING TOUR</b>                                                                                                                                                                                                                                                                                                                                                                                                                                                                                                                                                                                                                                                                                                                                                                                                     |                 |                    |
| To be able to know where different departments are<br>Able to access the building                                                                                                                                                                                                                                                                                                                                                                                                                                                                                                                                                                                                                                                                                                                                                           | 30mins          | Nonhlanhla/Marlise |
| <b>HIV update and myth buster</b>                                                                                                                                                                                                                                                                                                                                                                                                                                                                                                                                                                                                                                                                                                                                                                                                           | 3hours          | Londiwe/Hlolisile  |
| Able to know HIV transmission<br>Multilevel HIV prevention<br>Able to know correct condom use<br>Able to know meaning of VL suppression<br>Why VL vs CD4<br>Able to know if HIV is curable                                                                                                                                                                                                                                                                                                                                                                                                                                                                                                                                                                                                                                                  |                 |                    |
| <b>AHRI OVERVIEW OF PIP AND POPC (Vukuzazi)</b>                                                                                                                                                                                                                                                                                                                                                                                                                                                                                                                                                                                                                                                                                                                                                                                             | 1hour           | Thobeka and Resign |
| Able to explain, in simple terms, what Africa Health Research Institute (AHRI) does<br>Able to explain, in broad terms, what the Population Intervention Platform (PIP) aims to contribute<br>Able to list the main ways in which PIP differs from the former DSS, from a field work perspective] SHORT LIFE L.O.<br>Able to explain, in broad terms, the contribution of fieldwork to the PIP<br>Able to explain, in simple terms, that additional research modules will become part of PIP<br><br>Able to explain, in simple terms, why pilot studies are conducted<br>Able to explain, in simple terms, why randomisation is important and how it works.<br>Able to explain, as though to a participant, examples of good things that AHRI research has brought to the local population<br>Able to list major sources of funding for PIP |                 |                    |
| <b>AHRI DIFFERENT STUDY INTRODUCTION</b>                                                                                                                                                                                                                                                                                                                                                                                                                                                                                                                                                                                                                                                                                                                                                                                                    | 1hour           | Nonhlanhla         |

|                                                                                                                                                |        |                       |
|------------------------------------------------------------------------------------------------------------------------------------------------|--------|-----------------------|
| Able to understand each project that belong to AHRI                                                                                            | 30mins | Nonhlanhla/Sithembile |
| <b>HOME ENTRY</b>                                                                                                                              | 1hour  | Noma/Ncengani         |
| Able to know the home entry policy                                                                                                             |        |                       |
| Able to know the study area, tribal authority and the geographic area                                                                          |        |                       |
| Able to know and demonstrate home entry steps                                                                                                  |        |                       |
| Able to know what is done and not done when one is at the homestead                                                                            |        |                       |
|                                                                                                                                                |        |                       |
| <b>FINAL Training for 45-55 remaining peer navigators</b>                                                                                      |        |                       |
| <b>GOOD CLINICAL PRACTICE- confirmed 28 and 29 June 2018</b>                                                                                   | 2days  | Sphephelo             |
| <b>CHILD PROTECTION</b>                                                                                                                        | 1day   | Fikile                |
| <b>Right and the law</b>                                                                                                                       |        |                       |
| Able to outline in simple terms key legal rights and responsibilities to support child protection in South Africa                              |        |                       |
| Able to give brief definitions of both abuse and child exploitation                                                                            |        |                       |
| Able to describe the ways in which consent processes differ for under 18s- in comparison with adult                                            |        |                       |
| Able to outline right to confidentiality of all children                                                                                       |        |                       |
| <b>Correct Age</b>                                                                                                                             |        |                       |
| Able to explain that a person's incorrect age may sometimes be given (e.g. error; 'round up 'near birthdays)                                   |        |                       |
| Able to give reason why knowing the correct age of a participant is essential to participants and to AHRI for ethical and legal reasons.       |        |                       |
| Able to consistently and correctly calculate age from date of birth                                                                            |        |                       |
| Able to define correctly the lower limit of age for inclusion as a participant in the research modules in which you are working                |        |                       |
| <b>AHRI Child Protection Procedures</b>                                                                                                        |        |                       |
| Confidentiality and children / young people                                                                                                    |        |                       |
| <b>Able to demonstrate a consistently empathic, calm, no judgemental and professional approach with young people</b>                           |        |                       |
| Able to demonstrate active listening skills when appropriate, when working with young people                                                   |        |                       |
| Able to respond appropriately response to a young person who asks for advice about sexual health                                               |        |                       |
| Able to discuss, as though to a participant, sexual health promotion including <ul style="list-style-type: none"> <li>• Condom use,</li> </ul> |        |                       |

|                                                                                                                                                                                              |        |                          |
|----------------------------------------------------------------------------------------------------------------------------------------------------------------------------------------------|--------|--------------------------|
| <ul style="list-style-type: none"> <li>• Voluntary male medical circumcision (VMMC)</li> <li>• PreP</li> <li>• A short explanation of commonly available methods of contraception</li> </ul> |        |                          |
| Able to demonstrate appropriate reassurance and support to a young person when indicated                                                                                                     |        |                          |
| Able to demonstrate appropriate advice-giving to young person to indicate to them the option for support or disclosure                                                                       |        |                          |
| Able to demonstrate familiarity with referral resource that lists options for urgent and non-urgent sexual health care, and describe where to obtain a copy at short notice                  |        |                          |
| Able to demonstrate the AHRI list of services, as though to a participant, in a way appropriate to the problem in hand                                                                       |        |                          |
| Able to perform simple assessment of possible child protection incident                                                                                                                      |        |                          |
| Able to explain in simpler terms how untreated HIV affects health over time                                                                                                                  | 3hours | Nonhlanhla/Clinical team |
| Able to explain the ways in which a) HIV is transmitted and how transmission can be prevented, or b) risk of transmission reduced                                                            |        |                          |
| Able to explain in simple terms the three UNAID's '90s' are (can express as 9 out of 10people) for HIV                                                                                       |        |                          |
| Able to explain in simple terms what the benefits for the communities and individuals of achieving the 90/90/90                                                                              |        |                          |
| Able to outline some of the commoner reason that people who know they have HIV, are slow to link to care-or fail to link                                                                     |        |                          |
| Able to list to the participant the advantages of knowing their HIV status                                                                                                                   |        |                          |
| Able to explain to a participant the advantages of regularly taking of ARV's to individual and community                                                                                     |        |                          |
| Able to explain in simple terms, as though to the participant, what is meant by term viral load (including suppressed and high results)                                                      |        |                          |
| Able, in simple terms, describe what needs to be done by individual to maintain a fully suppressed viral load                                                                                |        |                          |
| Able to discuss, a though to a participant, sexual health promotion including condom use, VMMC and knowing own HIV status and that of a partner                                              |        |                          |
| Able to demonstrate the correct and appropriate approach to asking individual questions and give an example when it is useful                                                                |        |                          |
| <b>GEOGRAPHIC INFORMATION SYSTEM</b>                                                                                                                                                         | 2hours | Sabelo                   |
| <b>Mapping and GPS</b>                                                                                                                                                                       |        |                          |

|                                                                                                        |        |                        |
|--------------------------------------------------------------------------------------------------------|--------|------------------------|
| Able to describe, with help of a map, the boundaries of the PIPSA, including the north and south parts |        |                        |
| Able to describe or name important landmarks at key points of the PIP boundary                         |        |                        |
| Able to scan documents correctly and reliable use of barcodes                                          |        |                        |
| <b>ADVERSE EVENTS</b>                                                                                  | 2hours | Gugu                   |
| Able to know in simple terms the meaning of AE                                                         |        |                        |
| Able to know how to report an AE                                                                       |        |                        |
| Able to know what to report as an AE                                                                   |        |                        |
| <b>THE OVERVIEW OF STAR PROJECT</b>                                                                    | 2hours | Carina                 |
| Able to explain in simple terms the STAR project to the community                                      |        |                        |
| Able to give information about HIV self-testing screening                                              |        |                        |
| Able to demonstrate how to use self- testing kit                                                       |        |                        |
| <b>CLINICAL GOVERNANCE</b>                                                                             | 2hours | Philippa               |
| Able to understand and explain in simple terms what clinical governance means                          |        |                        |
| <b>LINKAGE TO CARE</b>                                                                                 | 1hour  | Sanah/Siphephelo       |
| Learning objectives                                                                                    |        |                        |
| <b>CORRECT IDENTIFICATION OF PARTICIPANTS</b>                                                          | 2hours | Nonhlanhla             |
|                                                                                                        |        |                        |
| <b>HANDLING OF TABLET</b>                                                                              | 1hour  | Jaco                   |
| Able to know how to handle and use a tablet                                                            |        |                        |
| Able to trouble shoot when using the tablet                                                            |        |                        |
| <b>HANDLING OF ELECTRONIC DATA</b>                                                                     | 1hour  | Jaco                   |
| Able to know what RedCap is                                                                            |        |                        |
| Able to know how to use RedCap                                                                         |        |                        |
| Able to know the confidentiality that goes with electronic data and how it is kept                     |        |                        |
| <b>PROTOCOL</b>                                                                                        | 2hours | Natsayi                |
| Able to understand in simple terms what a protocol is                                                  |        |                        |
| Able to understand why the protocol is so important in research                                        |        |                        |
| Able to know when and how do we use the protocol                                                       |        |                        |
| <b>STUDY STANDARD OPERATIONAL PROCEDURE - SOP</b>                                                      | 3hours | Nonhlanhla/ Sithembile |
| Able to understand what a standard operating procedure is                                              |        |                        |
| Able to understand all SOP's used by the project                                                       |        |                        |
| Able to use the standard operating procedure                                                           |        |                        |

|                                                                                                                                                                                                                                     |                          |                          |
|-------------------------------------------------------------------------------------------------------------------------------------------------------------------------------------------------------------------------------------|--------------------------|--------------------------|
| <b>UNDERSTANDING HIV PREVENTION INTERVENTIONS</b>                                                                                                                                                                                   | 2hours                   | Nonhlanhla/Natsayi       |
| Able to identify the various HIV prevention interventions available in their community and in general                                                                                                                               |                          |                          |
| Able to identify organisations providing care and treatment in their communities                                                                                                                                                    |                          |                          |
| Able to identify and refer young people to organisations for support, care and treatment                                                                                                                                            |                          |                          |
| <b>KNOWLEDGE OF RIGHTS OF YOUNG PEOPLE</b>                                                                                                                                                                                          | 1hour                    | Nonhlanhla               |
| Able to identify the rights of young people including in accessing health, social welfare – right to have an Identification, rights to education and right to accurate and correct information etc                                  |                          |                          |
| <b>BASIC RESEARCH METHODS</b>                                                                                                                                                                                                       | 3hours                   | Natsayi /Nonhlanhla      |
| Able to explain in simple terms why research is important                                                                                                                                                                           |                          |                          |
| Able to list the various methods used to collect data                                                                                                                                                                               |                          |                          |
| Able to list the various tools used to collect data                                                                                                                                                                                 |                          |                          |
| Able to explain the uses of data                                                                                                                                                                                                    |                          |                          |
| Able to explain why data collected has to be accurate                                                                                                                                                                               |                          |                          |
| <b>Lay counselling</b>                                                                                                                                                                                                              | 14days                   | Outsourced               |
| <b>Basic HIV/AIDS and other STIs management</b>                                                                                                                                                                                     | Inclusive in the 14 days | Outsourced               |
| OPTIONS CONSORTIUM (WRHI: Ambassadors training for Peer Navigators)                                                                                                                                                                 | 3days                    | External/outsourced/WRHI |
| <b>HIV Prevention Ambassador Training:</b> The HIV Prevention Ambassadors training package was developed to support the meaningful engagement of young people and their communities in the rollout of oral PrEP for HIV prevention. |                          |                          |
