# Supplementary material for: Thetha Nami: participatory development of a peer-navigator intervention to deliver biosocial HIV prevention for adolescents and youth in rural South Africa
Source: PubMed Central journal article supplement (PMC8278686; doi:10.1186/s12889-021-11399-z), 2021-07-13
Supplement: 12889_2021_11399_MOESM5_ESM.pdf [file 12889_2021_11399_MOESM5_ESM.pdf]

**Isisekelo Sempilo: HIV prevention embedded in sexual health: A pilot trial to optimize Thetha nami (peer-delivery) of HIV prevention and care to adolescents and young adults in rural KwaZulu-Natal**

**Thetha Nami Follow Up**

**Contact Attempts**

Individual Record ID (Auto Number)

Contact Attempts (up to 6 attempts)

**Participant's Contact Information**

BSID

Name of the Bounded Structure Owner

Name of the Household head

Participant's Surname

Participant's First names

Participant's Sex

Participant's Age

Week block

Week

Participant's Primary Contact Number

In which Study Arm:

**Staff Member Code:**

Attempt Date and Time.....

Was the participant contacted No/Yes, Yes, but participant is mentally incapacitated

Was the participant willing to be surveyed/assisted/followed-up? No/Yes

Reschedule next visit date.....

Refused participation.....

Who refused participation? Self; Partner; Household Head; Bounded Structure Owner; Parent/Guardian; Other

Specify other person who refused participation.....

**FOR FIELD TEAM**

Non-Contact - Handover to Project Coordinator

Fieldworker: Request handover of Non-Contact to Project Coordinator? No/Yes

**Select reason for non-contact in field**

Not found after 4 attempts

Temporarily away for more than 2 months Stay in currently Avoided BS/HH

Out-migrated to unknown destination

Out-migrated within PIPSA, but unable to visit Contacted, but unable to conduct survey after 4x contact attempts

Unable to acquire parental consent after 4x contact visits

Reported to be involved in gang activities Other

Specify other reason for non-contact from field:.....

Fieldworker: Please provide narrative

**Premature completion**

Was this a Pre-mature completion? No/Yes

Select reason for pre-mature completion Reported dead? Out migrated outside PIPSA, Other

Specify other reason for pre-mature completion:.....

Visit Information: Visit Date.....

**Personal Information**

Individual Record ID (Auto Number)

Ulwazi lomuntu siqu Personal Information

Actual BSID

Coordinate - Latitude Coordinate - Latitude

Coordinate - Longitude Coordinate - Longitude

Isibongo Surname

Igama Firstname/s

Sicela unikeze usuku lokuzalwa okuyilona Please provide the correct Date of Birth.....

Inombolo kamazisi ebhaliwe noma inombolo yesitifiketi sokuzalwa Pre-printed National ID or Birth certificate number.....

Ubulili Sex Male/Female

Sicela ucacise inombolo kamakhala ekhukhwini ongathanda ukufonelwa kuyo Please provide your primary contact number (mobile).....

**Location/Izigodi:**

Ebaswazini

Esiyembeni

Gunjaneni

Kwamsane Reserve

KwaMsane Township North

KwaMsane Township South

Kwahoho

Machibini  
Macambini  
Mahunjini  
Mapheleni  
Mshaya  
Myeki  
Mvutshini  
Indlovu Village  
Nkolokotho  
Nkombose North  
Nkombose South  
Nomathiya  
Nqopheni  
Nsolweni  
Ophondweni  
Ogengele  
Ophaphasi

**Introduction peer navigator name and institution and name of study:**

Hello I am ..... from AHRI and I am working as a Theta Nami peer navigator in the HIV prevention programme.

**Memory Note**

- Greet the participant with respect irrespective of their age
- Ask if they can give you few minutes of their time.
- If yes, introduce yourself and the organization
- Introduce Theta Nami and the Isisekelo sempilo study and make you sure you mention that we are trying to understand young people's need and how we can support them.
- Remember to capture their needs on the tablet-based monitoring tool.
- If requested, please provide support and refer participant to relevant services (check the list of services with you).

Is the person willing to speak to you? No/Yes

What is the main reason why this participant is not willing to speak to you? Not interested; In a hurry, can't speak now; Other

Please provide other reason why the person was not willing to speak to you.....

**Goal of Theta Nami**

The goal of the Theta Nami is to help young people aged 16-30 years to navigate their communities, support and link them into HIV prevention, treatment and care services among social and education issues you may have.

**Theta Nami Survey**

**Place where young person was found:**

School  
Health care facility - clinic/hospital Home  
Town

Watering place  
Social gathering specify Sporting event specify Community meeting Other specify  
Please provide other/more details regarding the place where this person was found:.....

**Type of need the young person has:**                      Yes              No              Don't know

Health  
Social e.g. need grants, employment advice  
Social vulnerability e.g. violence, psychosocial, child protection, alcohol/substance addition  
Education Legal  
Other, specify below  
Please specify details regarding the other type of need.....

Please list and specify the type of assistance they required from you eg knowledge of where to get  
contraception, help with getting an ID book, assistance with educational bursaries

**HIV testing, care and prevention information and counselling    Tick any that apply [repeat  
responses for all services below]**

Information provided  
Referral  
Not needed  
N/A

**To which organisation/s was the person referred to?    [repeat for all services below]**

Isisekelo Sempilo Clinic  
DoH  
Private Doctor CCG  
EDI Isikondlakondla  
DsD  
Ezibayeni Unyezi Isikondlakondla  
TB/HIV Care Association DoE  
Mpilonhle Star for Life  
DsD  
SAPS  
Youth Champion CCG  
Tribal Authority Municipality  
I don't know  
Other specify .....  
Please provide details about another Provider.....

**PrEP counselling**

**Male circumcision (voluntary medical circumcision) not traditional circumcision**

**Condom promotion or provision**

**Adolescent-friendly services**

**Sexual and reproductive health**

**Safe spaces**

**Social Assets programs - Financial capabilities**

**Gender norms and Violence prevention related programs - e.g. Stepping Stones and Violence prevention education and Gender norms-related education (talks or activities), e.g. Vhutshilo Financial literacy training for girls/young women and young boys/men, e.g. Stokvel and Microfinance programs (Financial services including loans, savings insurance available to poor entrepreneurs and SME who have no collateral to apply for a loan), run savings clubs and opening bank accounts**

**Vocational skills training, Business/entrepreneurial training**

**Local program for caregiving, e.g. Parent/care-giver positive caregiving program, or programs for parents about improving adolescent-parent communication**

**HIV education in school or Life skills-based education/Life orientation program curriculum used in school**

**Post-violence care, (including sexual, physical or emotional)**

**Legal, (Linkage to judiciary, Police, Affidavit)**

**CV writing/career support**

**Education support**

**Recreation**
